# Supplementary material for: Love thy neighbour: facilitation through an alternative signalling modality in plants
Source: PubMed Central journal article supplement (PMC3651341; doi:10.1186/1472-6785-13-19), 2013-05-07
Supplement: 1472-6785-13-19-S1.pdf [file 1472-6785-13-19-S1.pdf]

## Additional file 1 [Gagliano and Renton]

### Love thy neighbour: facilitation through an alternative signalling modality in plants

**Table A1:** Results of statistical analysis of basil germination data. Each step in the analysis is shown on a separate row, starting with the maximal model, and showing how the model was simplified step by step. Each row includes the name of the mixed effects model fitted at that step; all terms in the model (random effects shown in brackets); the resulting AIC for the fitted model; the candidate term to be dropped; the comparison model ('cf. mod', ie the more complex model containing the candidate term that was compared with the current model not containing the candidate term using a chi-squared test); the p-value obtained from the model comparison test; and the best model retained at the end of the step. Note that a significant p-value means that the simpler (current) model is significantly worse than the more complex comparison model, and so the more complex model is retained as 'best', while a non-significant p-value means that the simpler (current) model is not significantly worse than the more complex comparison model, and so the simpler model is retained as 'best'. Also note that in every case, the decision based on the p-value was supported by the AIC, such that the 'best' retained model always had the lower AIC.

| name  | all terms                                                           | df | AIC    | candidate term     | cf. mod | p-val      | best |
|-------|---------------------------------------------------------------------|----|--------|--------------------|---------|------------|------|
| fm1   | grp + t + (t   bx/dsh) + (1   bx/dsh) + (t   bx) + (1   bx) + grp:t | 18 | 1831.6 | -                  | -       | -          | -    |
| fm2   | grp + t + (t   bx/dsh) + (t   bx) + (1   fm2: bx) + grp:t           | 16 | 1827.5 | (1 bx/dsh)         | fm1     | 1          | fm2  |
| fm3   | grp + t + (t   bx) + (1   bx) + grp:t                               | 10 | 1931.0 | (t bx/dsh)         | fm2     | <0.0001*** | fm2  |
| fm4   | grp + t + (t   bx/dsh) + (1   bx) + grp:t                           | 13 | 1821.5 | (t bx))            | fm2     | 1          | fm4  |
| fm5   | grp + t + (t   bx/dsh) + grp:t                                      | 12 | 1819.5 | (1 bx)             | fm4     | 0.9997     | fm5  |
| fm6   | grp + t + grp:t                                                     | 7  | 1937.6 | (t bx/dsh)         | fm5     | <0.0001*** | fm5  |
| fm7   | grp + t + (t   bx/dsh)                                              | 10 | 1818.0 | grp:t              | fm6     | 0.2874     | fm7  |
| fm8   | t + (t   bx/dsh)                                                    | 8  | 1822.0 | -grp               | fm7     | 0.01841*   | fm7  |
| fm9   | grp + (t   bx/dsh)                                                  | 9  | 1884.7 | t                  | fm7     | <0.0001*** | fm7  |
| fm10~ | newgrp + t + (t   bx/dsh)                                           | 9  | 1817.5 | Open/Masked pooled | fm7     | 0.21       | fm10 |
| fm8+  | t + (t   bx/dsh)                                                    | 8  | 1822.0 | All pooled         | fm10    | 0.01129*   | fm10 |

~ at this step the Open and Masked treatments were pooled to test for whether there were significant differences between these two treatments; as  $p > 0.05$  and AIC was lower, the simpler model with pooled treatments was retained as 'best'

+ at this step the Control treatment was pooled with the previously pooled Control and Masked treatments to test for whether there were significant differences between the Open treatment and the others; as  $p < 0.05$  and AIC was higher, the more complex model with different treatments was retained as 'best'

**Table A2:** Results of statistical analysis of chilli germination data. Each step in the analysis is shown on a separate row, starting with the maximal model, and showing how the model was simplified step by step. Each row includes the name of the mixed effects model fitted at that step; all terms in the model (random effects shown in brackets); the resulting AIC for the fitted model; the candidate term to be dropped; the comparison model ('cf. mod', ie the more complex model containing the candidate term that was compared with the current model not containing the candidate term using a chi-squared test); the p-value obtained from the model comparison test; and the best model retained at the end of the step. Note that a significant p-value means that the simpler (current) model is significantly worse than the more complex comparison model, and so the more complex model is retained as 'best', while a non-significant p-value means that the simpler (current) model is not significantly worse than the more complex comparison model, and so the simpler model is retained as 'best'. Also note that in every case, the decision based on the p-value was supported by the AIC, such that the 'best' retained model always had the lower AIC.

| name  | all terms                                                   | df | AIC    | candidate term        | cf. mod | p-val      | best |
|-------|-------------------------------------------------------------|----|--------|-----------------------|---------|------------|------|
| fm1   | grp * t + (t   bx/dsh) + (1   bx/dsh) + (t   bx) + (1   bx) | 18 | 1297.0 | -                     | -       | -          | -    |
| fm2   | grp + t + (t   bx/dsh) + (t   bx) + (1   fm2: bx) + grp:t   | 16 | 1293.4 | (1 bx/dsh)            | fm1     | 1          | fm2  |
| fm3   | grp + t + (t   bx) + (1   bx) + grp:t                       | 10 | 1381.1 | (t bx/dsh)            | fm2     | <0.0001*** | fm2  |
| fm4   | grp + t + (t   bx/dsh) + (1   bx) + grp:t                   | 13 | 1287.4 | (t bx))               | fm2     | 1          | fm4  |
| fm5   | grp + t + (t   bx/dsh) + grp:t                              | 12 | 1285.4 | (1 bx)                | fm4     | 0.9997     | fm5  |
| fm6   | grp + t + grp:t                                             | 7  | 1398.3 | (t bx/dsh)            | fm5     | <0.0001*** | fm5  |
| fm7   | grp + t + (t   bx/dsh)                                      | 10 | 1282.2 | grp:t                 | fm6     | 0.6765     | fm7  |
| fm8   | t + (t   bx/dsh)                                            | 8  | 1284.6 | -grp                  | fm7     | 0.04064*   | fm7  |
| fm9   | grp + (t   bx/dsh)                                          | 9  | 1342.5 | t                     | fm7     | <0.0001*** | fm7  |
| fm10~ | newgrp + t + (t   bx/dsh)                                   | 9  | 1280.2 | Control/Masked pooled | fm7     | 0.9037     | fm10 |
| fm8+  | t + (t   bx/dsh)                                            | 8  | 1284.6 | All pooled            | fm10    | 0.01147 *  | fm10 |

~ at this step the Control and Masked treatments were pooled to test for whether there were significant differences between these two treatments; as  $p > 0.05$  and AIC was lower, the simpler model with pooled treatments was retained as 'best'

+ at this step the Open treatment was pooled with the previously pooled Control and Masked treatments to test for whether there were significant differences between the Open treatment and the others; as  $p < 0.05$  and AIC was higher, the more complex model with different treatments was retained as 'best'
